# Supplementary material for: Role of molar-ratio, temperature and solvent on the Zn/Cd 1,2,4-triazolate system with novel topological architectures
Source: Royal Society of Chemistry journal article supplement (doi:10.1039/c0ce00762e), 2011-01-01
Supplement: c0ce00762e.pdf [file c0ce00762e.pdf]

## Supporting Information

# Role of molar-ratio, temperature and solvent on the Zn/Cd 1,2,4-triazolate system with novel topological architectures

*Pei-Xiu Yin,<sup>a</sup> Jian Zhang,<sup>a</sup> Ye-Yan Qin,<sup>a</sup> Jian-Kai Cheng,<sup>a</sup> Zhao-Ji Li,<sup>a</sup> and Yuan-Gen*

*Yao<sup>\*a</sup>*

<sup>a</sup>The State Key Laboratory of Structural Chemistry, Fujian Institute of Research on  
the Structure of Matter, The Chinese Academy of Sciences, Fuzhou, Fujian 350002,

P. R. China

E-mail: [yyg@fjirsm.ac.cn](mailto:yyg@fjirsm.ac.cn)

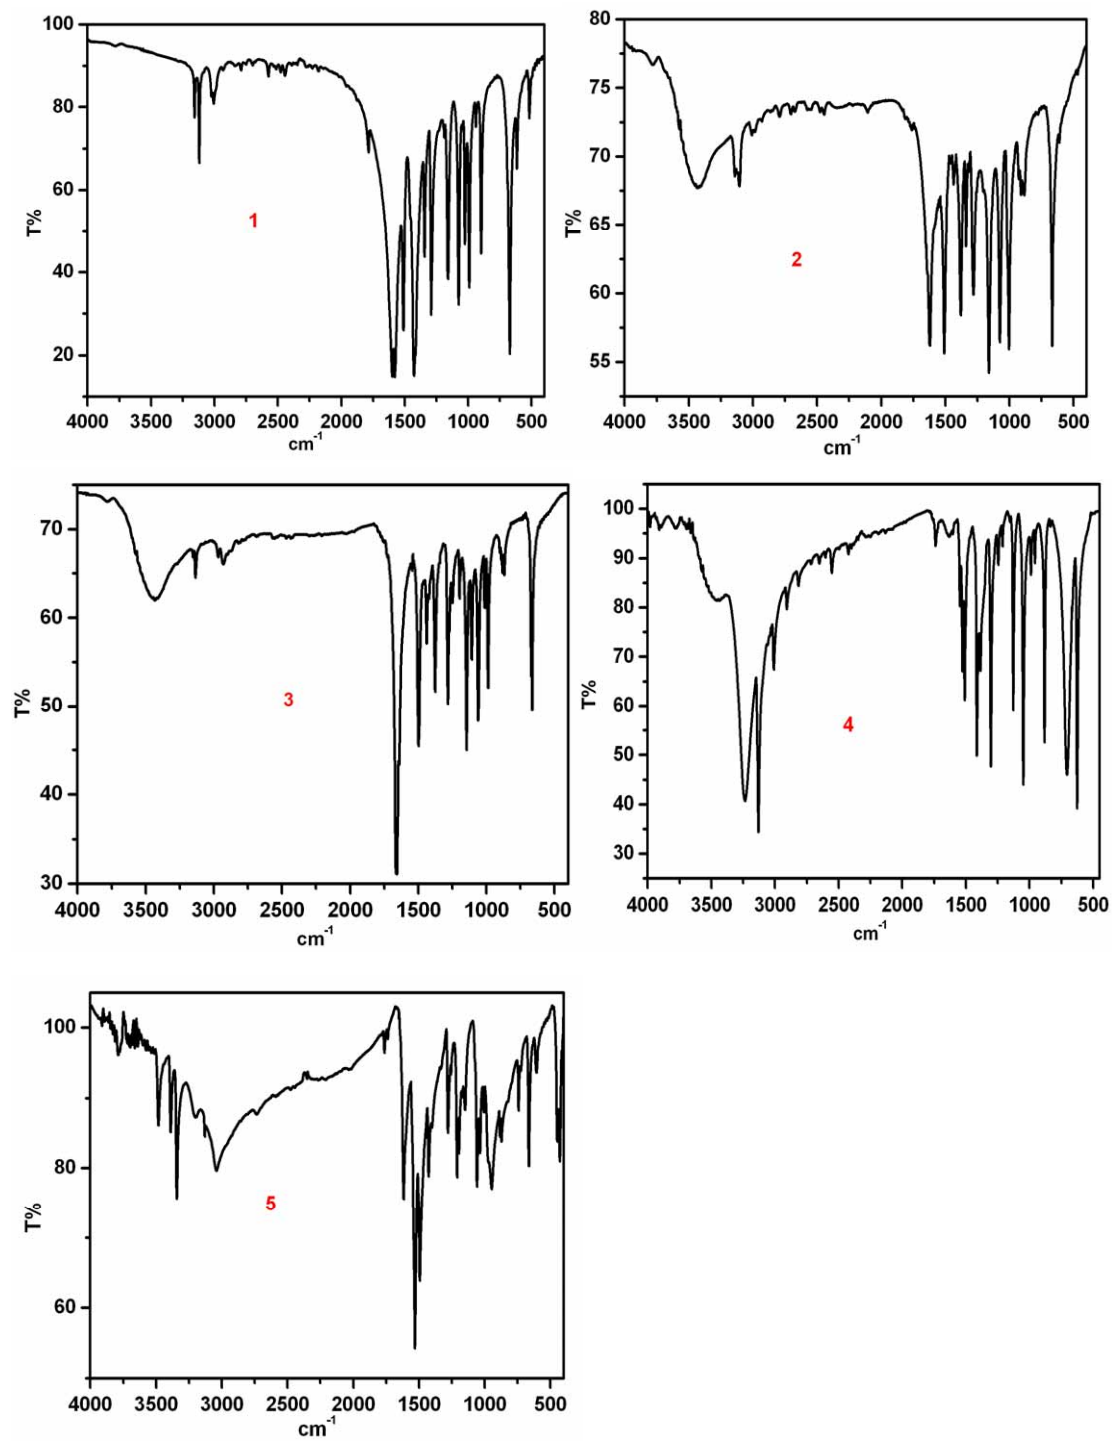

**Fig.S1** The IR spectra of complexes 1-5.

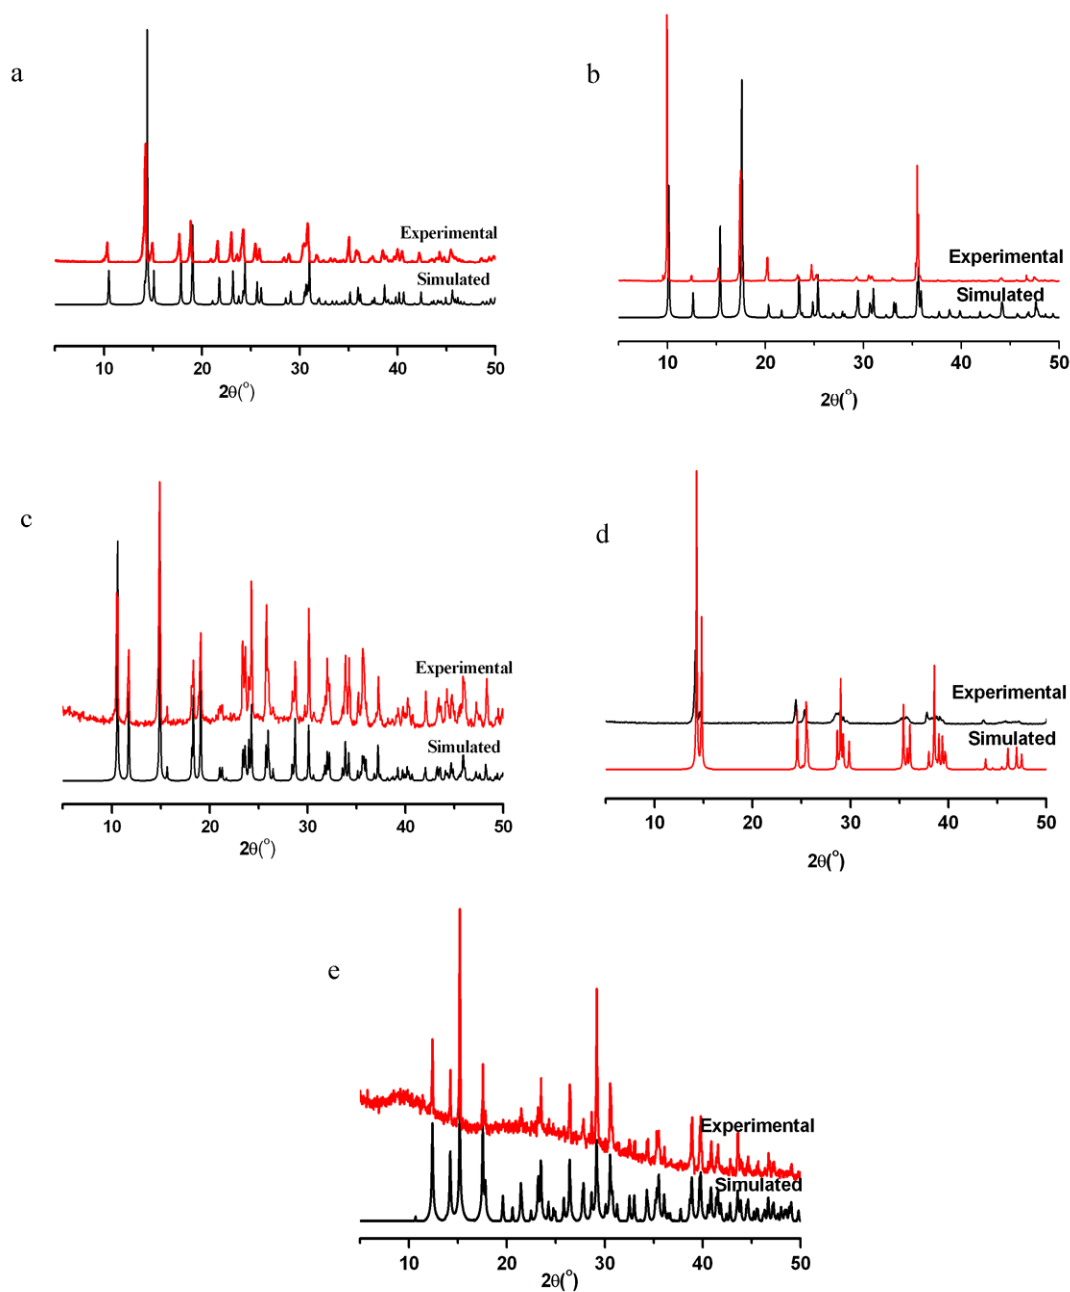

**Fig. S2** The simulated and experimental XRD diagrams of each compound in this work: (a)-1, (b)-2, (c)-3, (d)-4 and (e)-5, red, experimental data, black, simulated from single-crystal X-ray data.

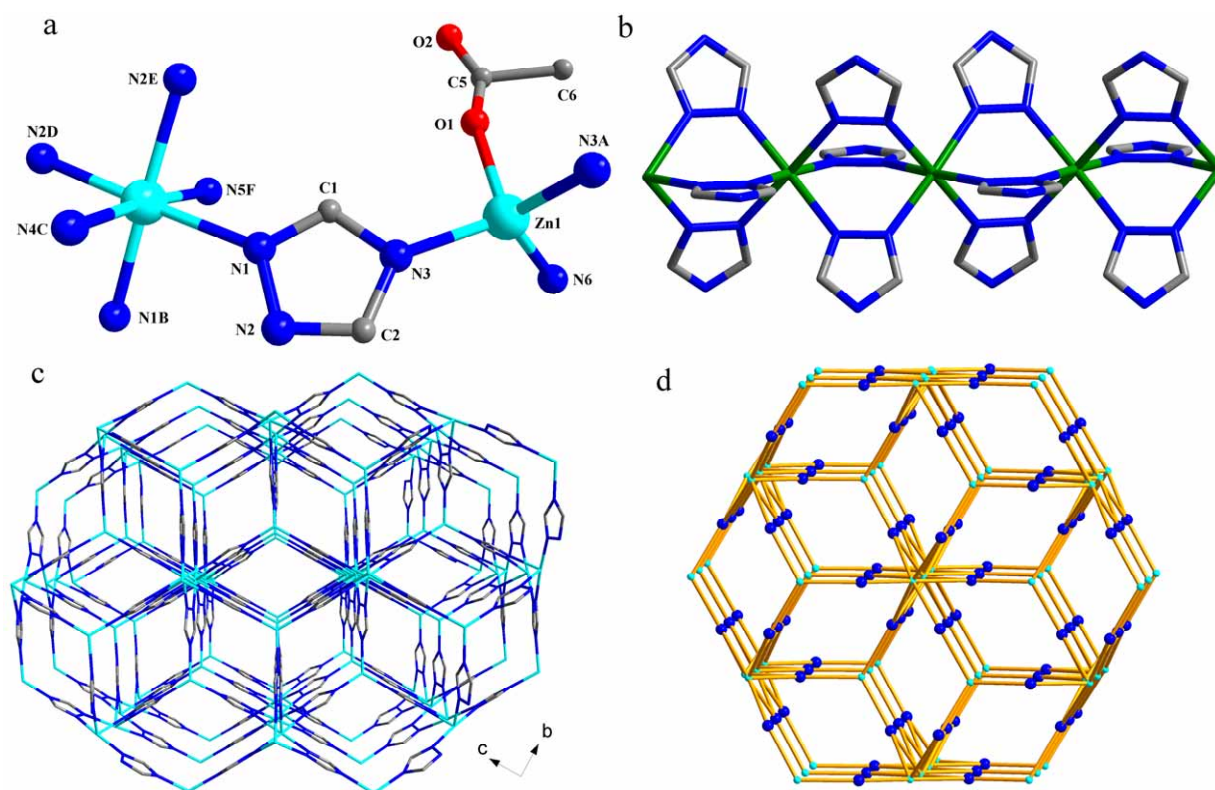

**Fig. S3** (a) Details of the coordination environments of Zn1 and Zn2 in complex 2. Symmetry codes for generated atoms: A:  $x, -0.5 - y, z$ ; B:  $x, 0.5 - y, z$ ; C:  $0.5 - x, -y, -0.5 + z$ ; D:  $-0.5 + x, 0.5 - y, -0.5 - z$ ; E:  $-0.5 + x, y, -0.5 - z$ ; F:  $-x, 0.5 + y, -z$ . (b) 1D chain of  $\{Zn(TAZ)_3\}_n^{-}$  comprising Zn(2). (c) Perspective view of the 3D structure, acetate groups have been omitted for clarity. (d) Schematic representation of the 3D (3,6)-connected net.

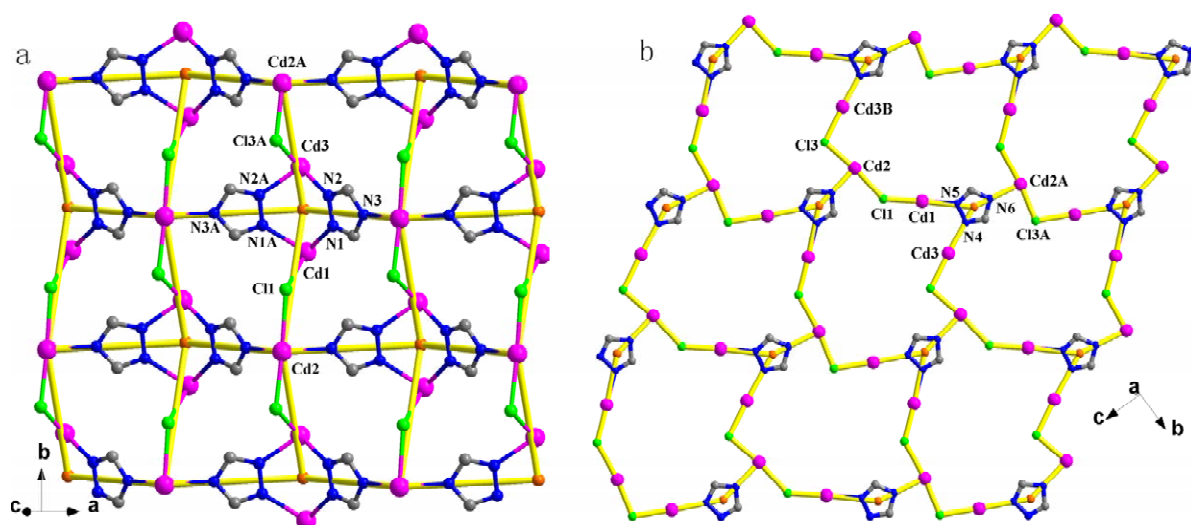

**Fig. S4** View of two types of 2D substructures of complex **3**: (a) 2D (4, 4) layer and (b) 2D layer based on macrocycle. Symmetry codes for generated atoms: (a) A:  $-2 - x, -y, -0.5 + z$ ; B:  $x, -1 + y, z$ . (b) A:  $-2 - x, y, z$ ; B:  $x, 1 + y, z$ .

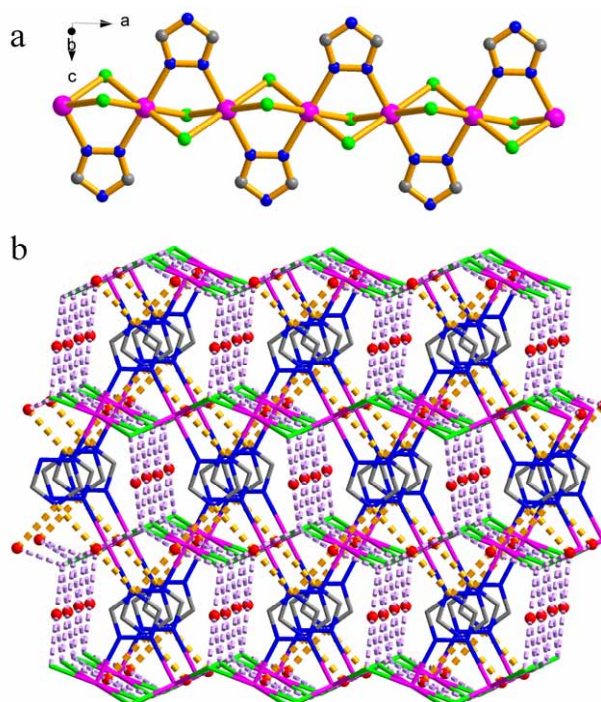

**Fig. S5** (a) Portion of the 1D tribridged  $[\text{Cd}(\text{TAZ})\text{Cl}_2]_n$  chain in **4**. (b) Perspective view of the 3D supramolecular architecture of **4**.

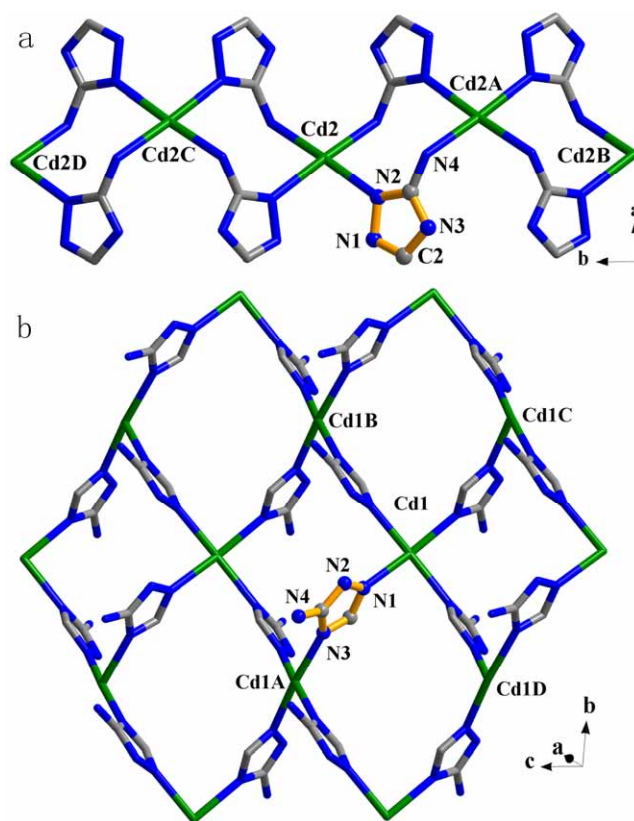

**Fig. S6** View of two structural motifs in **5** bridged by  $\mu_4$ -AmTAZ: (a)  $\mu_4$ -AmTAZ bridge Cd(2) into 1D double-bridged chain and (b)  $\mu_4$ -AmTAZ link Cd(1) into 2D (4,4) layer. Symmetry codes for generated atoms: (a) A:  $1 - x, -0.5 + y, -z$ ; B:  $x, -1 + y, z$ ; C:  $1 - x, 0.5 + y, -z$ ; D:  $x, 1 + y, z$ . (b) A:  $0.5 - x, -y, 0.5 + z$ ; B:  $0.5 - x, 1 - y, 0.5 + z$ ; C:  $0.5 - x, 1 - y, -0.5 + z$ ; D:  $0.5 - x, -y, -0.5 + z$ .

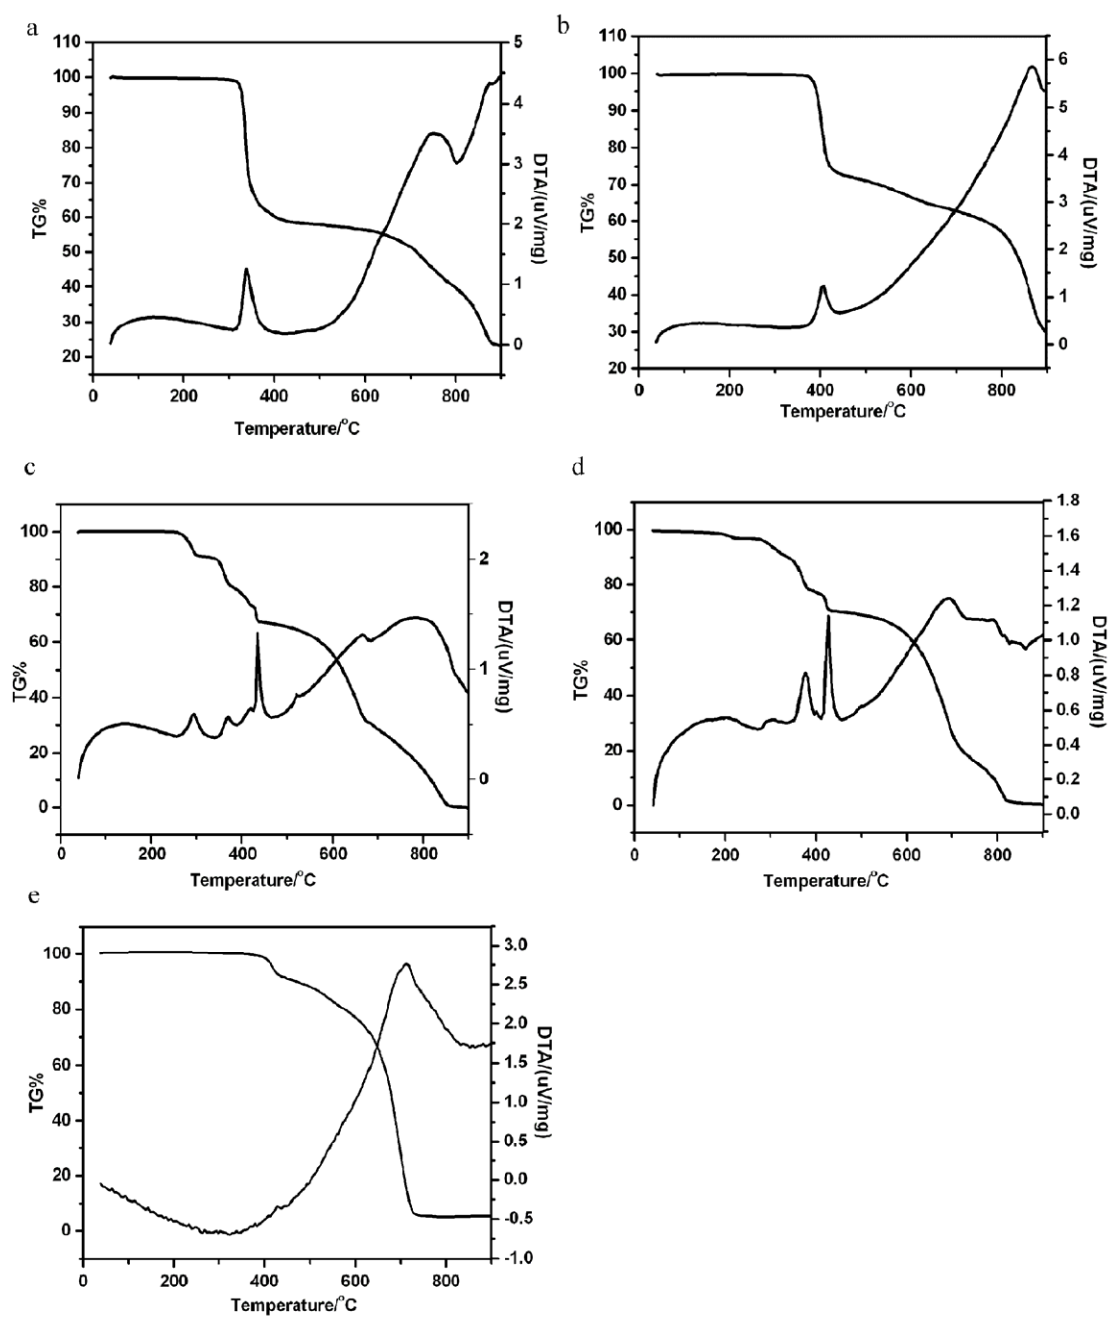

**Fig. S7** TG-DTA curves of complexes 1-5: (a)-1, (b)-2, (c)-3, (d)-4, (e)-5.

**Table S1.** Crystal Data and Structure Refinements for Compounds **1-5**

| param                                           | 1                                                             | 2                                                                           | 3                                                                                              | 4                                                                | 5                                                               |
|-------------------------------------------------|---------------------------------------------------------------|-----------------------------------------------------------------------------|------------------------------------------------------------------------------------------------|------------------------------------------------------------------|-----------------------------------------------------------------|
| formula                                         | C <sub>4</sub> H <sub>5</sub> ZnN <sub>3</sub> O <sub>2</sub> | C <sub>8</sub> H <sub>9</sub> Zn <sub>2</sub> N <sub>9</sub> O <sub>2</sub> | C <sub>12</sub> H <sub>20</sub> Cd <sub>3</sub> Cl <sub>3</sub> N <sub>11</sub> O <sub>2</sub> | C <sub>2</sub> H <sub>5</sub> CdCl <sub>2</sub> N <sub>3</sub> O | C <sub>6</sub> H <sub>9</sub> Cd <sub>2</sub> ClN <sub>12</sub> |
| fw                                              | 192.50                                                        | 394.02                                                                      | 793.97                                                                                         | 270.40                                                           | 509.52                                                          |
| temp(K)                                         | 293(2)                                                        | 293(2)                                                                      | 293(2)                                                                                         | 293(2)                                                           | 293(2)                                                          |
| cryst syst                                      | Orthorhombic                                                  | Orthorhombic                                                                | Orthorhombic                                                                                   | Orthorhombic                                                     | Orthorhombic                                                    |
| space group                                     | <i>Pmn2<sub>1</sub></i>                                       | <i>Pnma</i>                                                                 | <i>Cmc2<sub>1</sub></i>                                                                        | <i>Imma</i>                                                      | <i>Pnma</i>                                                     |
| <i>a</i> (Å)                                    | 9.303(6)                                                      | 7.663(3)                                                                    | 11.856(8)                                                                                      | 7.09(2)                                                          | 16.562(7)                                                       |
| <i>b</i> (Å)                                    | 8.413(6)                                                      | 10.104(4)                                                                   | 12.019(8)                                                                                      | 7.24(2)                                                          | 10.103(4)                                                       |
| <i>c</i> (Å)                                    | 8.161(6)                                                      | 17.426(8)                                                                   | 16.688(12)                                                                                     | 11.96(3)                                                         | 7.904(3)                                                        |
| <i>V</i> (Å <sup>3</sup> )                      | 638.7(8)                                                      | 1349.2(10)                                                                  | 2378(3)                                                                                        | 614(3)                                                           | 1322.5(9)                                                       |
| <i>Z</i>                                        | 4                                                             | 4                                                                           | 4                                                                                              | 4                                                                | 4                                                               |
| <i>D</i> <sub>calcd</sub> (g cm <sup>-3</sup> ) | 2.002                                                         | 1.940                                                                       | 2.218                                                                                          | 2.903                                                            | 2.559                                                           |
| <i>μ</i> (mm <sup>-1</sup> )                    | 3.778                                                         | 3.575                                                                       | 3.029                                                                                          | 4.334                                                            | 3.432                                                           |
| GOF                                             | 1.031                                                         | 1.107                                                                       | 1.072                                                                                          | 1.093                                                            | 1.079                                                           |
| R1 <sup>a</sup> ( <i>I</i> > 2σ( <i>I</i> ))    | 0.0276                                                        | 0.0312                                                                      | 0.0418                                                                                         | 0.0624                                                           | 0.0254                                                          |
| wR2 <sup>a</sup> (all data)                     | 0.0645                                                        | 0.0761                                                                      | 0.0956                                                                                         | 0.2198                                                           | 0.0592                                                          |

$$^a R1 = \frac{\sum ||F_o| - |F_c||}{\sum |F_o|}; \quad wR2 = \left\{ \frac{\sum [w(F_o^2 - F_c^2)^2]}{\sum [w(F_o^2)^2]} \right\}^{1/2}, \quad w = \frac{1}{[\sigma^2(F_o^2) + (aP)^2 + bP]}, \quad \text{where } P = [\max(F_o^2, 0) + 2F_c^2]/3 \text{ for all data.}$$



**Table S2.** Selected bond lengths (Å) and angles (°) for complexes **1-5<sup>a</sup>**

| Complex 1           |            |                     |            |
|---------------------|------------|---------------------|------------|
| Zn(1)-O(2)          | 1.923(4)   | Zn(2)-N(1)          | 2.124(3)   |
| Zn(1)-O(4)#1        | 1.936(4)   | Zn(2)-O(1)#4        | 2.140(4)   |
| Zn(1)-N(3)          | 2.020(3)   | Zn(2)-N(2)#5        | 2.161(3)   |
| Zn(1)-N(3)#2        | 2.020(3)   | Zn(2)-N(2)#6        | 2.161(3)   |
| Zn(2)-N(1)#3        | 2.124(3)   | Zn(2)-O(3)          | 2.201 (4)  |
| O(2)-Zn(1)-O(4)#1   | 111.88(17) |                     |            |
| O(2)-Zn(1)-N(3)     | 108.99(11) | O(1)#4-Zn(2)-N(2)#5 | 92.52(11)  |
| O(4)#1-Zn(1)-N(3)   | 113.76(10) | N(1)-Zn(2)-N(2)#6   | 175.86(11) |
| O(2)-Zn(1)-N(3)#2   | 108.99(11) | N(1)#3-Zn(2)-N(2)#6 | 90.17(12)  |
| O(4)#1-Zn(1)-N(3)#2 | 113.76(10) | O(1)#4-Zn(2)-N(2)#6 | 92.52(11)  |
| N(3)-Zn(1)-N(3)#2   | 98.65(18)  | N(2)#5-Zn(2)-N(2)#6 | 88.32(16)  |
| N(1)-Zn(2)-N(1)#3   | 91.07(16)  | N(1)-Zn(2)-O(3)     | 87.34(11)  |
| N(1)-Zn(2)-O(1)#4   | 91.40(11)  | N(1)#3-Zn(2)-O(3)   | 87.34(11)  |
| N(1)#3-Zn(2)-O(1)#4 | 91.40(11)  | O(1)#4-Zn(2)-O(3)   | 178.21(14) |
| N(1)-Zn(2)-N(2)#5   | 90.17(12)  | N(2)#5-Zn(2)-O(3)   | 88.77(11)  |
| N(1)#3-Zn(2)-N(2)#5 | 175.86(11) | N(2)#6-Zn(2)-O(3)   | 88.77(11)  |
| Complex 2           |            |                     |            |
| Zn(1)-O(1)          | 1.975(4)   | Zn(2)-N(2)#3        | 2.153(2)   |
| Zn(1)-N(6)          | 1.990(3)   | Zn(2)-N(2)#4        | 2.153(2)   |
| Zn(1)-N(3)#1        | 1.994(2)   | Zn(2)-N(1)#5        | 2.171(2)   |
| Zn(1)-N(3)          | 1.994(2)   | Zn(2)-N(1)          | 2.171(2)   |
| Zn(2)-N(4)#2        | 2.130(3)   | Zn(2)-N(5)#6        | 2.237(3)   |
| O(1)-Zn(1)-N(6)     | 105.11(16) |                     |            |
| O(1)-Zn(1)-N(3)#1   | 100.93(9)  | N(2)#4-Zn(2)-N(1)#5 | 89.15(9)   |
| N(6)-Zn(1)-N(3)#1   | 115.86(8)  | N(4)#2-Zn(2)-N(1)   | 90.30(8)   |
| O(1)-Zn(1)-N(3)     | 100.93(9)  | N(2)#3-Zn(2)-N(1)   | 89.15(9)   |
| N(6)-Zn(1)-N(3)     | 115.86(8)  | N(2)#4-Zn(2)-N(1)   | 176.21(8)  |

---

|                     |            |                     |            |
|---------------------|------------|---------------------|------------|
| N(3)#1-Zn(1)-N(3)   | 114.97(13) | N(1)#5-Zn(2)-N(1)   | 90.68(12)  |
| N(4)#2-Zn(2)-N(2)#3 | 93.48(8)   | N(4)#2-Zn(2)-N(5)#6 | 174.65(11) |
| N(4)#2-Zn(2)-N(2)#4 | 93.48(8)   | N(2)#3-Zn(2)-N(5)#6 | 90.28(8)   |
| N(2)#3-Zn(2)-N(2)#4 | 90.76(12)  | N(2)#4-Zn(2)-N(5)#6 | 90.28(8)   |
| N(4)#2-Zn(2)-N(1)#5 | 90.30(8)   | N(1)#5-Zn(2)-N(5)#6 | 85.94(8)   |
| N(2)#3-Zn(2)-N(1)#5 | 176.21(8)  | N(1)-Zn(2)-N(5)#6   | 85.94(8)   |

Complex 3

|                     |           |                    |            |
|---------------------|-----------|--------------------|------------|
| Cd(1)-N(1)          | 2.314(7)  | Cd(2)-N(6)#4       | 2.281(10)  |
| Cd(1)-N(1)#1        | 2.314(7)  | Cd(2)-Cl(3)        | 2.631(3)   |
| Cd(1)-O(1)          | 2.326(8)  | Cd(2)-Cl(1)        | 2.799(3)   |
| Cd(1)-O(1)#1        | 2.326(8)  | Cd(3)-N(2)         | 2.251(7)   |
| Cd(1)-N(5)          | 2.350(10) | Cd(3)-N(2)#1       | 2.251(7)   |
| Cd(1)-Cl(1)         | 2.597(3)  | Cd(3)-N(4)         | 2.359(11)  |
| Cd(2)-N(3)#2        | 2.258(7)  | Cd(3)-Cl(2)        | 2.481(3)   |
| Cd(2)-N(3)#3        | 2.258(7)  | Cd(3)-Cl(3)#5      | 2.658(4)   |
| N(1)-Cd(1)-N(1)#1   | 100.6(3)  |                    |            |
| N(1)-Cd(1)-O(1)     | 170.9(4)  | N(3)#2-Cd(2)-Cl(3) | 97.69(16)  |
| N(1)#1-Cd(1)-O(1)   | 86.4(3)   | N(3)#3-Cd(2)-Cl(3) | 97.69(16)  |
| N(1)-Cd(1)-O(1)#1   | 86.4(3)   | N(6)#4-Cd(2)-Cl(3) | 87.1(2)    |
| N(1)#1-Cd(1)-O(1)#1 | 170.9(4)  | N(3)#2-Cd(2)-Cl(1) | 84.02(15)  |
| O(1)-Cd(1)-O(1)#1   | 86.0(6)   | N(3)#3-Cd(2)-Cl(1) | 84.02(15)  |
| N(1)-Cd(1)-N(5)     | 87.1(2)   | N(6)#4-Cd(2)-Cl(1) | 86.4(2)    |
| N(1)#1-Cd(1)-N(5)   | 87.1(2)   | Cl(3)-Cd(2)-Cl(1)  | 173.54(11) |
| O(1)-Cd(1)-N(5)     | 87.6(3)   | N(2)-Cd(3)-N(2)#1  | 102.1(4)   |
| O(1)#1-Cd(1)-N(5)   | 87.6(3)   | N(2)-Cd(3)-N(4)    | 91.1(2)    |
| N(1)-Cd(1)-Cl(1)    | 92.59(18) | N(2)#1-Cd(3)-N(4)  | 91.1(2)    |
| N(1)#1-Cd(1)-Cl(1)  | 92.59(18) | N(2)-Cd(3)-Cl(2)   | 128.89(18) |
| O(1)-Cd(1)-Cl(1)    | 92.8(3)   | N(2)#1-Cd(3)-Cl(2) | 128.89(18) |
| O(1)#1-Cd(1)-Cl(1)  | 92.8(3)   | N(4)-Cd(3)-Cl(2)   | 91.0(2)    |

|                     |          |                      |           |
|---------------------|----------|----------------------|-----------|
| N(5)-Cd(1)-Cl(1)    | 179.5(3) | N(2)-Cd(3)-Cl(3)#5   | 90.6(2)   |
| N(3)#2-Cd(2)-N(3)#3 | 146.5(4) | N(2)#1-Cd(3)-Cl(3)#5 | 90.6(2)   |
| N(3)#2-Cd(2)-N(6)#4 | 105.2(2) | N(4)-Cd(3)-Cl(3)#5   | 177.3(2)  |
| N(3)#3-Cd(2)-N(6)#4 | 105.2(2) | Cl(2)-Cd(3)-Cl(3)#5  | 86.36(12) |

#### Complex 4

|                       |           |                       |            |
|-----------------------|-----------|-----------------------|------------|
| Cd(1)-N(1)            | 2.296(10) | Cd(1)-Cl(1)#1         | 2.638(5)   |
| Cd(1)-N(1)#1          | 2.296(10) | Cd(1)-Cl(1)#3         | 2.638(5)   |
| Cd(1)-Cl(1)#2         | 2.638(5)  | Cd(1)-Cl(1)           | 2.638(5)   |
| N(1)-Cd(1)-N(1)#1     | 180.0     |                       |            |
| N(1)-Cd(1)-Cl(1)#2    | 91.8(2)   | Cl(1)#2-Cd(1)-Cl(1)#3 | 180.0      |
| N(1)#1-Cd(1)-Cl(1)#2  | 88.2(2)   | Cl(1)#1-Cd(1)-Cl(1)#3 | 95.9(2)    |
| N(1)-Cd(1)-Cl(1)#1    | 91.8(2)   | N(1)-Cd(1)-Cl(1)      | 88.2(2)    |
| N(1)#1-Cd(1)-Cl(1)#1  | 88.2(2)   | N(1)#1-Cd(1)-Cl(1)    | 91.8(2)    |
| Cl(1)#2-Cd(1)-Cl(1)#1 | 84.1(2)   | Cl(1)#2-Cd(1)-Cl(1)   | 95.9(2)    |
| N(1)-Cd(1)-Cl(1)#3    | 88.2(2)   | Cl(1)#1-Cd(1)-Cl(1)   | 180.00(17) |
| N(1)#1-Cd(1)-Cl(1)#3  | 91.8(2)   | Cl(1)#3-Cd(1)-Cl(1)   | 84.1(2)    |

#### Complex 5

|                     |            |                     |            |
|---------------------|------------|---------------------|------------|
| Cd(1)-N(7)          | 2.309(4)   | Cd(2)-N(6)#4        | 2.296(4)   |
| Cd(1)-N(1)#1        | 2.330(3)   | Cd(2)-N(2)#1        | 2.337(3)   |
| Cd(1)-N(1)          | 2.330(3)   | Cd(2)-N(2)          | 2.337(3)   |
| Cd(1)-N(3)#2        | 2.348(3)   | Cd(2)-N(4)#5        | 2.481(3)   |
| Cd(1)-N(3)#3        | 2.348(3)   | Cd(2)-N(4)#6        | 2.481(3)   |
| Cd(1)-Cl(1)         | 2.7622(15) | Cd(2)-Cl(1)         | 2.6259(14) |
| N(7)-Cd(1)-N(1)#1   | 90.60 (11) | N(6)#4-Cd(2)-N(2)#1 | 91.02(10)  |
| N(7)-Cd(1)-N(1)     | 90.60(11)  | N(6)#4-Cd(2)-N(2)   | 91.02(10)  |
| N(1)#1-Cd(1)-N(1)   | 85.86(15)  | N(2)#1-Cd(2)-N(2)   | 95.94(14)  |
| N(7)-Cd(1)-N(3)#2   | 96.85(10)  | N(6)#4-Cd(2)-N(4)#5 | 100.07(10) |
| N(1)#1-Cd(1)-N(3)#2 | 171.68(10) | N(2)#1-Cd(2)-N(4)#5 | 87.19(10)  |
| N(1)-Cd(1)-N(3)#2   | 90.34(10)  | N(2)-Cd(2)-N(4)#5   | 168.44(10) |

|                     |            |                     |            |
|---------------------|------------|---------------------|------------|
| N(7)-Cd(1)-N(3)#3   | 96.85(10)  | N(6)#4-Cd(2)-N(4)#6 | 100.07(10) |
| N(1)#1-Cd(1)-N(3)#3 | 90.34(11)  | N(2)#1-Cd(2)-N(4)#6 | 168.44(10) |
| N(1)-Cd(1)-N(3)#3   | 171.68(10) | N(2)-Cd(2)-N(4)#6   | 87.19(10)  |
| N(3)#2-Cd(1)-N(3)#3 | 92.44(14)  | N(4)#5-Cd(2)-N(4)#6 | 87.65(15)  |
| N(7)-Cd(1)-Cl(1)    | 172.84(11) | N(6)#4-Cd(2)-Cl(1)  | 178.47(11) |
| N(1)#1-Cd(1)-Cl(1)  | 84.17(8)   | N(2)#1-Cd(2)-Cl(1)  | 87.96(7)   |
| N(1)-Cd(1)-Cl(1)    | 84.17(8)   | N(2)-Cd(2)-Cl(1)    | 87.96(7)   |
| N(3)#2-Cd(1)-Cl(1)  | 88.09(7)   | N(4)#5-Cd(2)-Cl(1)  | 81.02(7)   |
| N(3)#3-Cd(1)-Cl(1)  | 88.09(7)   | N(4)#6-Cd(2)-Cl(1)  | 81.02(7)   |

<sup>a</sup>Symmetry codes: **1**: #1 -x+1/2, -y+2, z-1/2; #2 -x+1, y, z; #3 -x, y, z; #4 -x+1/2, -y+3, z+1/2; #5 x-1/2, -y+2, z+1/2; #6 -x+1/2, -y+2, z+1/2. **2**: #1 x, -y-1/2, z; #2 -x+1/2, -y, z-1/2; #3 x-1/2, y, -z-1/2; #4 x-1/2, -y+1/2, -z-1/2; #5 x, -y+1/2, z; #6 -x, -y, -z. **3**: #1 -x-2, y, z; #2 x-1/2, y-1/2, z; #3 -x-3/2, y-1/2, z; #4 -x-2, -y, z+1/2; #5 x, y+1, z. **4**: #1 -x-1/2, -y+1/2, z-1/2; #2 -x, -y+1/2, z; #3 x-1/2, y, -z-1/2. **5**: #1 x, -y+1/2, z; #2 -x+1/2, -y, z-1/2; #3 -x+1/2, y+1/2, z-1/2; #4 x+1/2, y, -z+1/2; #5 -x+1, y+1/2, -z; #6 -x+1, -y, -z.
